# Supplementary material for: TAREAN: a computational tool for identification and characterization of satellite DNA from unassembled short reads
Source: PubMed Central journal article supplement — Nucleic Acids Res. 2017 Apr 10;45(12):e111. doi: 10.1093/nar/gkx257 (PMC5499541; doi:10.1093/nar/gkx257), 2017-04-10
Supplement: gkx257_supp.pdf [file gkx257_supp.pdf]

# Tandem Repeat Analyzer

## Run statistics:

Number of input sequences: 990220  
 Number of analyzed sequences: 990220  
 Threshold for cluster merging: 0.2  
 Proportion of sequences in analyzed clusters : 77 %

## Consensus files - fasta format:

[Putative satellites \(high confidence\) - total 13 found](#)  
[Putative satellites \(low confidence\) - total 17 found](#)  
[Putative LTR elements - total 3 found](#)  
[rDNA - total 1 found](#)

## Documentation

For the explanation of TAREAN output see [the help section](#)

## How to cite:

A paper on TAREAN is in preparation. Publications about graph-based repeat clustering and RepeatExplorer are listed below.

Novak, P., Neumann, P., Pech, J., Steinhals, J., Macas, J. (2013) - [RepeatExplorer: a Galaxy-based web server for genome-wide characterization of eukaryotic repetitive elements from next generation sequence reads](#) *Bioinformatics* **29**:792-793.

Novak, P., Neumann, P., Macas, J. (2010) - [Graph-based clustering and characterization of repetitive sequences in next-generation sequencing data](#). *BMC Bioinformatics* **11**:378.

## Putative satellites (high confidence)

# Example of TAREAN output

## (HTML summary of results)

Input data: 990,220 reads  
from *Vicia faba*

| Cluster | Genome Proportion(%) | Size real | Satellite probability | Consensus length | Consensus | Kmer analysis                                                                                                                                                                                                                                                                                                                                                                                                                                                                                                                                                                                                                                                                                                                                                                                                                                                                                                                                                                                                                                                                                                                                                                                                                                                                                      | Graph layout           | Connected component index C | Pair completeness index C | Kmer coverage | V     | E       | Pbs score | The longest ORF length | Similarity based annotation |
|---------|----------------------|-----------|-----------------------|------------------|-----------|----------------------------------------------------------------------------------------------------------------------------------------------------------------------------------------------------------------------------------------------------------------------------------------------------------------------------------------------------------------------------------------------------------------------------------------------------------------------------------------------------------------------------------------------------------------------------------------------------------------------------------------------------------------------------------------------------------------------------------------------------------------------------------------------------------------------------------------------------------------------------------------------------------------------------------------------------------------------------------------------------------------------------------------------------------------------------------------------------------------------------------------------------------------------------------------------------------------------------------------------------------------------------------------------------|------------------------|-----------------------------|---------------------------|---------------|-------|---------|-----------|------------------------|-----------------------------|
| 7       | CL7                  | 3.200     | 32038                 | 0.98             | 59        | GTCTGTTGCGAAGATTTTGTACTCAATGGATGGTACCTTGTCTATGGAAGTA                                                                                                                                                                                                                                                                                                                                                                                                                                                                                                                                                                                                                                                                                                                                                                                                                                                                                                                                                                                                                                                                                                                                                                                                                                               | <a href="#">report</a> | 1.00                        | 0.99                      | 0.54          | 13667 | 2.0e+07 | 0         | 78                     |                             |
| 11      | CL11                 | 1.200     | 12005                 | 0.98             | 191       | CATCCAAATTTAGGTACTCATCTAGCAAGTAAAGACTAATTAAGTACATATTCATATACA<br>TTGAAATAATCAATATCATGTAGTATATTTACCACATATCATATGATATGATATAAGA<br>TGAAACAATTCATATTTCTCTCTC                                                                                                                                                                                                                                                                                                                                                                                                                                                                                                                                                                                                                                                                                                                                                                                                                                                                                                                                                                                                                                                                                                                                             | <a href="#">report</a> | 1.00                        | 0.99                      | 0.56          | 12005 | 1.4e+07 | 0         | 49                     |                             |
| 39      | CL39                 | 0.290     | 2862                  | 0.97             | 702       | TAATACTAAAAGGAGGCAACTAAATGGTGGGTAAAGAAATTTCCGCAAAACAGTAGCTAGGTC<br>GCCTTTGCAACCAAGTATTTTCTGAAATCAACCATTTTCAAAATTTTATAAACAATGCCTG<br>AGGACACCAATTAAGTATATATCTACTGACATATTTTCTCATTGATTTTCAATTTGTCAT<br>AGTATAGGCTAGTCTCTCTATAAAGATTCTAATAAGACAAAGAGAGTGTCTCTGTC<br>CTTGAAGAGGAAATAGAGCAACAGCAATATGCCATAAAGTATTTAATGACCTCTTTGTT<br>GAAAAGCGCTAATACCGTCCCAATGTAAGCATTGTTTAAATAGCACCTTAAAGAGCT<br>TTAATATAAATAAATAAATTAATAAACAATAAATAAAGAGGCAACGAAATTTGTTG<br>TCATAAACAATAGCTGCGCTGACCTGCTGCTAATATAAATAAATAAATAAATTTTAA                                                                                                                                                                                                                                                                                                                                                                                                                                                                                                                                                                                                                                                                                                                                                                                  | <a href="#">report</a> | 0.98                        | 0.98                      | 0.45          | 2862  | 2.1e+05 | 0         | 117                    |                             |
| 62      | CL62                 | 0.150     | 1436                  | 0.99             | 687       | GTCATGATAGTAAATGGCTATTTCTAGTAAATGATTAATTTAGTTATAAATAAATAATATAT<br>TTATGCTATTTTCTCAATGCTAGTAAATGGCTAATTTGATTAATAAATAAATGATGAAAGT<br>AGTGTATAGGCTTTTCTTATTAATCGGATTTATGATATATAATTTTATAAATAAATAA<br>GATTTATATTTGAAATTTAAGTAAATGATTTATTTTGGAGAGTATTTAATCATTAAAA<br>TGAGTAACCCCAATTAAGTATATATCTACTGACATATTTTCTCATTGATTTTCAATTT<br>AACATTACTGAAATGATTAATAAAGTAAAGTAAAGTAAAGTAAAGTAAAGTAAAGTAA<br>AAGTAAAGTAAAGTAAAGTAAAGTAAAGTAAAGTAAAGTAAAGTAAAGTAAAGTAAAGT<br>TTTATGCTCCATCTCAAGTAGGAGTCTCTCACTCTGCAATTTTATCTGATATGAAAGT<br>AGTAAATTTATCATTCTGAAATAAGTCACTCTCTTTAATTTGAAATCTCATAGAC                                                                                                                                                                                                                                                                                                                                                                                                                                                                                                                                                                                                                                                                                                                    | <a href="#">report</a> | 0.99                        | 0.98                      | 0.27          | 1436  | 3.3e+04 | 0         | 60                     |                             |
| 70      | CL70                 | 0.120     | 1175                  | 0.93             | 38        | CTGATGAAATTTGAAGTGAACATAAATCGAAGAAAT                                                                                                                                                                                                                                                                                                                                                                                                                                                                                                                                                                                                                                                                                                                                                                                                                                                                                                                                                                                                                                                                                                                                                                                                                                                               | <a href="#">report</a> | 0.95                        | 0.96                      | 0.41          | 1175  | 1.7e+04 | 0         | 195                    |                             |
| 108     | CL108                | 0.049     | 487                   | 0.97             | 1482      | AATGAGTTTTTTAAATAATGATAAATCTATTTTTTTGATAAATATATATTTTCAACATTTACCTTTA<br>AAATAAATCTAAATCATCATAGTCTTTAGTAGTCTGTTAAGAGGCTTTTAAATAAATAAAGT<br>TAACAAATTAATCTTTTCTGAAATCAACCATTTTCAAAATTTGATGATATAGAAATTTGG<br>ATCGTTACTTATCAATAAATAAACAATAATTTATGCTTACATGACGTCATCATCTGAAATTTCTAC<br>GAAAAGTATAATATATAATCAAAATTTGCGAAAATAAATGTTGATCAATTTAAAAGAGTATAAAGT<br>ACATTAACCATAGTCTAAATGTTTAAACCATGGAAGTAAACCATTTTCTACCGCATATAATATAA<br>AATATGTTAGTTTTAATAGCAATATTTAAATAATTTATGATAATTTTATAGATAAAGGCTAAATATT<br>TTAACAACATATGTAATTTGTTAAAATAAATAAATAAATAAATAAATAAATAAATAAATAA<br>TTAAATAAATAAATAAATAAATAAATAAATAAATAAATAAATAAATAAATAAATAAATAA<br>TTCACATATATTTAGTCACTTTGGTAAATCATAGTAAAGCTTTTCAATCTCATAGTATTAATCT<br>GTTTTCTATAAATAAATAAATAAATAAATAAATAAATAAATAAATAAATAAATAAATAAATAA<br>CTCTCTTAAGTTTTCTTATTTAAAGGAGCACTAAATTTTTTTCTTAAATTTGCTGCACTTTTAT<br>TGGTTTTCTACCTGAGTGTATTTGTTGGTAGGTAAGTAAAGTAAATCTTATGATGAAATATATTT<br>CTTTATATCTTATTAATCTTATAGGTTCTTCACTCGCAAAAGAACTCATAGATTTTATGCAACT<br>AGGTTGAGCAATTTTAAATAAATAAATAAATAAATAAATAAATAAATAAATAAATAAATAA<br>TGATGATTTAGGTTGAGGAGCTCTTTAGTAAAGTCTTTGATGATTTGATGATGATGATGATG<br>CTGAGCTTGAATAAATAAATAAATAAATAAATAAATAAATAAATAAATAAATAAATAAATAA<br>TTAAGAAATTAATTTGAGTAAATCAATGATTTGCTGATTTTGTAAACATGAGGCTGATTTGAACT<br>TCTACTTATATCTATTAATTTATTTGATATATAA | <a href="#">report</a> | 0.99                        | 1.00                      | 0.61          | 487   | 6.7e+03 | 0         | 63                     |                             |
| 109     | CL109                | 0.047     | 461                   | 0.76             | 870       | CATTGCTATATCTGCGATCGAGATATATCATTTCAGCTCGAAATAAATAAATAAATAAATAA<br>ATATTTATGTTTTATATATATAGATATATATATTTTGGAAATCAATAAATAAATAAATAAATAA<br>ATATTTAATTTCTTTATATTTCTACCATTTAGTTAGGCTTCTACATGCTTCCGATTCATATTA<br>ACATGGAATACATATGGAAGTCAATATGACAGGTTTATCAATATGGGATTTCTTAAAGGTTATTT<br>TAACTCATGAGATTCACACCTGATGCTACAATATATATGAAAATAATGACATGCTTATCAATAAT<br>TTTTAAGAAATTTTAAATACATGCAAGATATAAACAATTTCCGCAAAATTCATAAAGGATTAAT<br>TTAAGACCTTTTACATAATTTAAAJACTTATGATTTTATTTAGTGTGTTGTTGTTGTTGTTG<br>TATGTTTAAAGGATCTTAAATTTGTTTGTGATATGTTGTTGTTGTTGTTGTTGTTGTTGTTG<br>TTTTGTAATAAATGATTTTGGAGTAAAGGAGGAAATAAATAAATAAATAAATAAATAAATAA<br>CTTTCAGTTATTTAAATAAATAAATAAATAAATAAATAAATAAATAAATAAATAAATAAATAA<br>CACATGATGAGTCACTTTTCACTGATTTTCAAAACCGAGAGATAAATAAACAAGTTTCAATCTG                                                                                                                                                                                                                                                                                                                                                                                                                                                                                                                                   | <a href="#">report</a> | 0.91                        | 0.95                      | 0.57          | 461   | 8.1e+03 | 0         | 116                    |                             |
| 123     | CL123                | 0.033     | 326                   | 0.95             | 878       | TCCTTTAATAAATAAATAAATAAATAAATAAATAAATAAATAAATAAATAAATAAATAAATAA<br>TCCCACTTAAATCATCTAATAAATAAATTTGTAATAAATGATCACTTCTGATGTTCTTAAATA<br>AATTTTCAATCAATAAATAAATAAATAAATAAATAAATAAATAAATAAATAAATAAATAAATAA<br>CACTATGCAATTCATCAATAAATAAATAAATAAATAAATAAATAAATAAATAAATAAATAAATAA<br>ACACTATGCAATTCATCAATAAATAAATAAATAAATAAATAAATAAATAAATAAATAAATAAATAA<br>ACACTTTTCAAGCTGATGATTAAGTCACTTAAAGGACTTGTGAGGTTAAACCCAGGTTTTAACT<br>TTAAGGCTCTTTGTTGATATCTTTGATGATGATGATGATGATGATGATGATGATGATGATGAT<br>TTAGTAGGAGTCTGATGATGATGATGATGATGATGATGATGATGATGATGATGATGATGATGAT<br>TCCATTTTGTGATATTTAGGATTAATAAACAATTTATTTAGCTTTTAAATAAATAAATAAATAA<br>CTCTAATAAATAAATAAATAAATAAATAAATAAATAAATAAATAAATAAATAAATAAATAAATAA<br>GATTTGATGATCTATTTATTTGTTGATATATATTTCTTTTAAATGTTTGCATATAGGTTGATGAT<br>TTGGTTGTTGCTTTAGCAATGATGATGATGATGATGATGATGATGATGATGATGATGATGATGAT                                                                                                                                                                                                                                                                                                                                                                                                                                                    | <a href="#">report</a> | 0.98                        | 0.99                      | 0.63          | 326   | 3.5e+03 | 0         | 91                     |                             |
| 137     | CL137                | 0.027     | 263                   | 0.88             | 603       | TGTTGATGCTGATGAAAGGACACATGAGGAGTCACTTTAGTAAATTTTCAAAACAATGAGGAT<br>AAATAAATCAATTAAGAAATAAATAAATTTCAACTTTAGATGGACAAATATGATGCTTAAATA<br>TATCTTCAATTTTAAACAATCAACATTTTATCATTTTCAATCTTAAATAAATAAATAAATAAATAA<br>AGTCTTAAATGGGAAAGAAATATATCTAGTCTTACACATTAAGGCTTATCAATAATGCTGCTG<br>GAATTAATCAATCAATGATGATGATGATGATGATGATGATGATGATGATGATGATGATGATGAT<br>TAAGTCTTGGACACCTGATGACATTTTGAAGTCACTCTCTTCAATAAATAAATAAATAAATAA<br>TGTGCGGCGACCTTATGTAAGAAATATATAAACCCTTTGCAATGGAGAAATCAATAAATCAAT<br>CAAAATAAATAAATAAATAAATAAATAAATAAATAAATAAATAAATAAATAAATAAATAAATAA                                                                                                                                                                                                                                                                                                                                                                                                                                                                                                                                                                                                                                                                                                                                          | <a href="#">report</a> | 0.97                        | 0.99                      | 0.47          | 263   | 2.4e+03 | 0         | 90                     |                             |
| 143     | CL143                | 0.023     | 230                   | 0.96             | 352       | ACGGTATGCAAAAGTCAATAAATTTAGTAAATTTAGAGCACTCACAAGACACAATAAATAAATAA<br>TAATAAATTTGATTAATGATGCTAAATGATTTAAACAACAAAAGAAAGCACTAATGCTGACATA<br>TTAATATACAAACAGCTGATGATGATGATGATGATGATGATGATGATGATGATGATGATGATGAT<br>TACCACACAATAAAGGATTAATGCTGACACAATAAATAAATTTAGGATTTACGAGGCTTTAGGAT<br>AAAAGAGCAATAAATAAATAAATAAATAAATAAATAAATAAATAAATAAATAAATAAATAAATAA                                                                                                                                                                                                                                                                                                                                                                                                                                                                                                                                                                                                                                                                                                                                                                                                                                                                                                                                               | <a href="#">report</a> | 1.00                        | 1.00                      | 0.58          | 230   | 5.7e+03 | 0         | 51                     |                             |

|     |       |       |     |      |     |                                                                                                                                                                                                                                                                                                                                                                                                                                                                                                                                                                                                                                                                                                                          |                        |      |      |      |     |         |   |    |  |
|-----|-------|-------|-----|------|-----|--------------------------------------------------------------------------------------------------------------------------------------------------------------------------------------------------------------------------------------------------------------------------------------------------------------------------------------------------------------------------------------------------------------------------------------------------------------------------------------------------------------------------------------------------------------------------------------------------------------------------------------------------------------------------------------------------------------------------|------------------------|------|------|------|-----|---------|---|----|--|
| 154 | CL154 | 0.019 | 186 | 0.98 | 560 | TATTTTATTTCAATGATTAATAAATAAGCAATGATCTATAACATAGGATGATCTACTGTAATCTATAA<br>CTCAATATGCTAGGGGGGATAAATCAATATATTGACTAGTCTTATATATCAATATTTGGGTACAAAACTTTG<br>TTTACAAATCAATGACTATCCATGGATGTTCCACCTATACACATATTTTCCATCAAAAATCTGATTTTGACT<br>GTAAACACATTTCAACTGATTTTAAGTATTTTAAAGTAAACACACATTTAGACACAAAGATTAAGGAATATAT<br>ATGATATTAAGTCTTAATTTGACATATCAAAATATTTAAATGAAGGATGATCTACATTTCTCTTTGATT<br>ATGGCAAAAGCTAGGATTTAATATCTGATAAAAACTCTCGAATATGTACCTTAAAGCATCTCCAATGGAG<br>AATTTTTGGTGGTGTGATATTTTGGTGTCCAAATGCAATGCAATTAAGCAGTCTAATCAACCTTAAT                                                                                                                                                                                      | <a href="#">report</a> | 0.98 | 0.96 | 0.58 | 186 | 1.4e+03 | 0 | 91 |  |
| 157 | CL157 | 0.018 | 182 | 0.99 | 781 | GGTAATGTATCACACGCTTTATTTTAAATAAATAAAGTAAGTTTTCTACTAATCAATCTTTTAAAGA<br>AGGAAGATACATTTGGTATTTGGCAGATGACGGGATGATATCTTCACTGCAACATTAATATGGATGAT<br>TTGTTTTCTCAATAACTCTATGTTGTAATTTTGAAGTCTTATATAAAGAAATGAGGATATTAAGCTTT<br>TTTTAATCATTGACATGTCACACATGTAGATAGATGAACCAATTAATGGAATGATATTTTCTGAAAC<br>CAAAATCTTTCTATAATATAGGTAGAAATGGTATCTTTTCAATATGATCATTAAAAACACATTAATGAT<br>ATATCTATTTGGTAAACCTTATCTTTTGGTCAAGATCATACTAATATCTAAGAAAACACTAAGAGTGGTG<br>TATCAACAGTTCTTACTGCTCAATGTAAGAAACACATAAAATTTTCTGATGATTTCAACCTCTACTGCG<br>TTATGTTAGTAAGTCTATTTTATACATTAATATTTTAAAGTCTGGGATGGAATGTAAAACTTA<br>CAATTTGACTTAAAAAATGACTAAAAATTAATTTTAAAGCAATGCTTTAATATGATAGATGATGAT<br>CTCTCATTTTGGCTAAAGAAATCAAGAATGAAGGTTACTATATGAATAAATAA | <a href="#">report</a> | 0.99 | 0.96 | 0.75 | 182 | 1.7e+03 | 0 | 97 |  |
| 158 | CL158 | 0.018 | 182 | 0.99 | 313 | GTGGATAGCACTGCAGACTTTATTTATGAAGATAAATAACAAATAAAGAACTCTTAATGTGGAATTTATTTG<br>TTTTATGATTTGCCCTAATTTATAGCAAGTAAAGCAAAACATATAGCATCTGCTGCTTTTCTCAAGCATCACTT<br>TATTTCTATAAATCACTCTCAATAAATGCTGGTGTGTTAAGATTTTCACTGATTTTCAACAGAGAGATGTTA<br>GGAACTACAAAAATTTCCCATAGTCGATCTGAAAGCGGTATAAATGGAATTAATAACAATACA                                                                                                                                                                                                                                                                                                                                                                                                                    | <a href="#">report</a> | 0.99 | 0.98 | 0.75 | 182 | 3.5e+03 | 0 | 70 |  |

**Putative satellites (low confidence)**

| Cluster | Genome Proportion[%] | Size real | Satellite probability | Consensus length | Consensus | Kmer analysis                                                                                                                                                                                                                                                                                                                                                                                                                                                                                                                                                                                                                                                                                                                                                                                                                                                                                                                                                                                                                                                                                                                                                                                           | Graph layout           | Connected component index C | Pair completeness index C | Kmer coverage | V    | E      | Pbs score | The longest ORF length | Similarity based annotation |
|---------|----------------------|-----------|-----------------------|------------------|-----------|---------------------------------------------------------------------------------------------------------------------------------------------------------------------------------------------------------------------------------------------------------------------------------------------------------------------------------------------------------------------------------------------------------------------------------------------------------------------------------------------------------------------------------------------------------------------------------------------------------------------------------------------------------------------------------------------------------------------------------------------------------------------------------------------------------------------------------------------------------------------------------------------------------------------------------------------------------------------------------------------------------------------------------------------------------------------------------------------------------------------------------------------------------------------------------------------------------|------------------------|-----------------------------|---------------------------|---------------|------|--------|-----------|------------------------|-----------------------------|
| 19      | CL19                 | 0.680     | 6755                  | 0.037            | 130       | GATAAAGATCAGAAAATCTTAGGATGATTTAACTGCAACGACAAAAGCTTGGAAATATCTCAACTGGAATAGAAAT<br>CAGGGAGACTTAGGGTGCATCTGACTGAACACAGAAAGGCTTTCGACTG                                                                                                                                                                                                                                                                                                                                                                                                                                                                                                                                                                                                                                                                                                                                                                                                                                                                                                                                                                                                                                                                       | <a href="#">report</a> | 0.95                        | 0.72                      | 0.26          | 6755 | 970393 | 0.000     | 173                    |                             |
| 26      | CL26                 | 0.470     | 4671                  | 0.022            | 50        | CCTGGCTAGATCAGGAATCGAATCTGGAATAGTGTGTCACAGATGTC                                                                                                                                                                                                                                                                                                                                                                                                                                                                                                                                                                                                                                                                                                                                                                                                                                                                                                                                                                                                                                                                                                                                                         | <a href="#">report</a> | 0.89                        | 0.62                      | 0.29          | 4671 | 610423 | 0.000     | 132                    |                             |
| 34      | CL34                 | 0.330     | 3241                  | 0.085            | 169       | GAAATTCAAAATAAACCCAGGGCTTGTGCAAAAGCTCAAGAACTTTGGGGCACTCTCAATGTGTTATTTGAGATGCTCA<br>TGCAAAATGACGACGAGATTTATTTCTAAGGCGGTTTGGCTCGCTTCCGTTTGGCAAAAAGCAATTCACGCG<br>GTACCGTGG                                                                                                                                                                                                                                                                                                                                                                                                                                                                                                                                                                                                                                                                                                                                                                                                                                                                                                                                                                                                                                | <a href="#">report</a> | 0.85                        | 0.98                      | 0.52          | 3241 | 545116 | 0.000     | 130                    | 0.52%<br>45S_rDNA/25S_rDNA% |
| 40      | CL40                 | 0.290     | 2857                  | 0.039            | 53        | AAATCTTTGAGAGTTTATCTGAACGAGTAAATCTCGAGATGAATCAGAAT                                                                                                                                                                                                                                                                                                                                                                                                                                                                                                                                                                                                                                                                                                                                                                                                                                                                                                                                                                                                                                                                                                                                                      | <a href="#">report</a> | 0.80                        | 0.69                      | 0.26          | 2857 | 136812 | 0.053     | 124                    |                             |
| 47      | CL47                 | 0.230     | 2280                  | 0.421            | 177       | TACGTTGAAGCAGACAGTCTCTAGATCTTGTGAAGATGTTTCCCTAGTGAAGTACTGACCGGTTCTTAAGATCTCA<br>ACTGAATTTCTCGTGAATTCAGATAGGTTCTCAATCTCGCAATTTTCCCTGCGAAGTGGACGAGTCTTA<br>CAATCTCAACGGTATAC                                                                                                                                                                                                                                                                                                                                                                                                                                                                                                                                                                                                                                                                                                                                                                                                                                                                                                                                                                                                                              | <a href="#">report</a> | 0.97                        | 0.81                      | 0.23          | 2280 | 198250 | 0.000     | 91                     |                             |
| 49      | CL49                 | 0.200     | 2004                  | 0.026            | 64        | ATACTATTCAGATTTCTCTAGAGATGTCAGATGTGATCAGATAGGCTGACATCTG                                                                                                                                                                                                                                                                                                                                                                                                                                                                                                                                                                                                                                                                                                                                                                                                                                                                                                                                                                                                                                                                                                                                                 | <a href="#">report</a> | 0.87                        | 0.63                      | 0.44          | 2004 | 128970 | 0.000     | 126                    |                             |
| 51      | CL51                 | 0.200     | 1984                  | 0.041            | 58        | TACTTGAATGAAGCTCGAATAGTGGGCTGGAAGGAACTGATAGTAGGGT                                                                                                                                                                                                                                                                                                                                                                                                                                                                                                                                                                                                                                                                                                                                                                                                                                                                                                                                                                                                                                                                                                                                                       | <a href="#">report</a> | 0.83                        | 0.70                      | 0.47          | 1984 | 500088 | 0.000     | 96                     |                             |
| 72      | CL72                 | 0.120     | 1139                  | 0.046            | 57        | TCCATCGGAGTAAACAATCTCAACACGAATCTCCCAATAGCAGGAGTACCA                                                                                                                                                                                                                                                                                                                                                                                                                                                                                                                                                                                                                                                                                                                                                                                                                                                                                                                                                                                                                                                                                                                                                     | <a href="#">report</a> | 0.80                        | 0.77                      | 0.48          | 1139 | 56254  | 0.000     | 173                    |                             |
| 79      | CL79                 | 0.100     | 1012                  | 0.024            | 50        | AAGTTTAAACAGCAAGGTTTGAATCAATACGACGAGATCAAGA                                                                                                                                                                                                                                                                                                                                                                                                                                                                                                                                                                                                                                                                                                                                                                                                                                                                                                                                                                                                                                                                                                                                                             | <a href="#">report</a> | 0.73                        | 0.85                      | 0.34          | 1012 | 26291  | 0.000     | 140                    |                             |
| 86      | CL86                 | 0.079     | 787                   | 0.066            | 1257      | TTGATTTTATGTTGCTGGTGAATAAACCAATTCACATACACAGTGTACTGATTTCTAGTTACATATGGAATTT<br>AAATTAAGTGTCAACTTCACTAAGAAAGCAATTTTGTAGAGTGGTCTCTGCTCAATTTTTTAAATGAT<br>TTAAATAGATGAATCAATCATATAGATATTTATGTTGTGTAATTTTATCCATTTAAATTAATTTTGTGAC<br>GAAATTTGGATTTTACTTTTATTTTAAAGGAAAATCTATTTAGTCCCTCAACTATATCTCTGGTTAACTTTGCT<br>CTCTTAATTTTCTTTTCTTTTATATATGATTTTCTTTTAAACCAACTATAAATCTCATATGATATAGACA<br>TCAATGAAATTTGAGCTTAACTCATATAGTTTCTTTTAAATGATTTTCAATTTTGGATGAACATGGTTTATAT<br>CTATGTTTGGATCATTTTACTGATTTTGGCAAAATAGGATTTACACATTTTAAAGTTTAAATTTGCTCT<br>TCAGTGTAAAGTAAACAGTAAAGTTTGTGTAATAAATAAATTAATTAACATTTTACACAATATCATAA<br>TTAGATCATATGTTTCTACATATCATAAATTAATCATGTTAAATTTGCTCTTTTATGATGTAATGATTAAT<br>ATCTATATAGATGACTTCAAAATATAAATTAAGATTTAACTTATTTGATTAAGAAATATAGAAATTA<br>TTATGTTGCAAAATTTTCTGCTAACTATCATATCTCTGCTGCAACAGAGTAAATATGAGGAAAGGAAACA<br>ACACATTTTGTGTTAATCTAGAAATAGAGTTTCAATGCAAAATAACACATTTAATTAATGTTGACATCA<br>AACATATATGATTTTAAAGTGTGTAATAAATAAAGTCAATTTGATGATGCTGTTAGTTGTTACTAGGAAA<br>TGATATAGAGGATGTTTAAACACATTTAGTCAAAATTTACTTTTATGATGATTTGATTAATGATGATTTG<br>TAAACAACTCTCACTTTAAAGGTTTAAAGTCACTTTTAAAGTGTCAATTAAGAGGCTATACAAAATAA<br>TAAATTAATGAGAAATTAATTAATTAATCAATTTCACTCCGATATCAAT | <a href="#">report</a> | 0.83                        | 0.85                      | 0.49          | 787  | 13558  | 0.000     | 90                     |                             |
| 117     | CL117                | 0.037     | 369                   | 0.063            | 687       | ATACCAACATGTTGATCTATATGATTTTAAATTAATACTAATATAGATATGGAATTAATCAAGG<br>TGGCCCATTAACAATATGCTCATTCAAGATAGATAAATCAATGATGTTTAAATTTTTTAAAGGAAATA<br>AABAAATTAATTTGATTAATACAAAGGAAATTAATCAATAAAGCAACTTGAAGAAACTTAAACAAAT<br>AAGATATAGTAAATAGGATTTAAACAATCTTACTTGGACATTTATCTACTGAAACAGTTTCTTCA<br>AATAAACAATTTAATGCTTTGACTAGAACATGTTTACAGATTTGAAATAGAAATTTAGCTGAAAGATAAA<br>AACATATCAAGATTAATTTTTTATAATCAAGCTCTGACTTGTCAACCAATTTGAGTTGAATGGAAGGATACA<br>TGCAGCCCAATTAAGTAAAGTGTCTATTTGATGCTGTTAGGATTTGGTCAAAATAGATTTGATGATTTT<br>AGTTTCTGATGTTTGGAGTTTGGTCTCTCTTTGTTGATTTCTCTATCTTTTCTCAATATATTTTGGAA<br>TTATAAATAAATAAATTTCTATGTTTAAATTTTTTATGTT                                                                                                                                                                                                                                                                                                                                                                                                                                                                                                                                                                 | <a href="#">report</a> | 0.75                        | 0.98                      | 0.55          | 369  | 5745   | 0.000     | 71                     |                             |
| 121     | CL121                | 0.033     | 327                   | 0.086            | 44        | ATGATCATGATGATGAACCTTTACACTAGTCAAGTATGTA                                                                                                                                                                                                                                                                                                                                                                                                                                                                                                                                                                                                                                                                                                                                                                                                                                                                                                                                                                                                                                                                                                                                                                | <a href="#">report</a> | 0.85                        | 0.97                      | 0.52          | 327  | 4746   | 0.000     | 51                     |                             |
| 124     | CL124                | 0.033     | 326                   | 0.088            | 867       | ATATTCATATATGTTTTTTTTGTTGATGTTTAAATGTTTAAATTTTTCTATATCAATAAAGACATTTA<br>TAATCTAAATTCATATAGCTTAATATAAGTCAATATGAAATAGAAATCAATCTGACAGGATGGAACAAAT<br>TTCACTCTAGCAAGTGGTTTTTATCTAATAAAGGAAATAAATGCTACAGTGTACATGTTGTTGTTGATAA<br>AGATGAAGATGATCAATAACTTTGTAATATCCGATACACTGATGCTCACTTGGCGAAATTTATGTTCAACATAT<br>GGATCAATGATATATCGGACATCTAGGAGTCTGCTCTTATATTTTAAACAGAAACAAATATATCTCAGG<br>TGTTTTCTTATGCTCTACTACAGATTTAAATTAAGTCTCCCAAAATTTATAGGTTTCAAGACTTGAACATA<br>CTTCTCTAAATTAATAACAATTTCTAGTTTATTTGAAATAGATAGTGGTTACCCCTTACTTGAAGTTGAG<br>TTTTGAAAGGTTGACGGTGAATCAATTTAAATCATGCTTGAATTTAGAGTTTTTCTCAAGGCTCACTCGA<br>GATTAATAGCTCAAAATCGATATATATGATGATGATGATGATGATGATGATGATGATGATGATGATGATGAT<br>CACAATTTACAGTGTGATGATGATGATGATGATGATGATGATGATGATGATGATGATGATGATGATGATGATGAT<br>AACTTTTACATGATGATGATGATGATGATGATGATGATGATGATGATGATGATGATGATGATGATGATGATGAT                                                                                                                                                                                                                                                                                                                                                 | <a href="#">report</a> | 0.80                        | 0.99                      | 0.61          | 326  | 3636   | 0.000     | 74                     | 7.06%<br>organelle/plastid% |



rDNA

| Cluster | Genome Proportion[%] | Size real | Satellite probability | Consensus length | Consensus | Kmer analysis                                                                                                                                                                                                                                                                                                                                                    | Graph layout           | Connected component index C | Pair completeness index C | Kmer coverage | V   | E     | Pbs score | The longest ORF length | Similarity based annotation |                  |
|---------|----------------------|-----------|-----------------------|------------------|-----------|------------------------------------------------------------------------------------------------------------------------------------------------------------------------------------------------------------------------------------------------------------------------------------------------------------------------------------------------------------------|------------------------|-----------------------------|---------------------------|---------------|-----|-------|-----------|------------------------|-----------------------------|------------------|
| 98      | CL98                 | 0.06      | 596                   | 0.99             | 362       | GGGTAAATATTATCGTTAGCAAGGATAAAACATAAATCTGGTGTAAATTTTATTTGGTGTAAATATTATCGTTA<br>ATAAGGAGAAAACGAATAATTCGGTTAAATTTAATTTGTTGTCGGGAGACTAAAATGCCGGTAATAAGGAAA<br>GACCCGAATATGTATACAATAAAGAGCATTACATACAGGTGCGATCACCAGCAGCAATGACCCGGATCCCATCAGA<br>ACTCCGACGTTAAGCGTCTTGGGCGAGAGTAGTACTAGGATGGTGACCTCCCTGGGAAGTCTTGTGTGCACCTCTTT<br>TTGCGTATTTTGAAGGAGTCTTTTATTTTATTAATCG | <a href="#">report</a> | 0.99                        | 0.99                      | 0.83          | 596 | 41572 | 0         | 86                     | 43.29%                      | 5S_rDNA/5S_rDNA% |

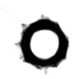

Other clusters

| Cluster | Genome Proportion[%] | Size real | Satellite probability | Consensus length | Consensus | Kmer analysis | Graph layout | Connected component index C | Pair completeness index C | Kmer coverage | V     | E       | Pbs score | The longest ORF length | Similarity based annotation      |
|---------|----------------------|-----------|-----------------------|------------------|-----------|---------------|--------------|-----------------------------|---------------------------|---------------|-------|---------|-----------|------------------------|----------------------------------|
| 1       | CL1                  | 16.000    | 162199                | 7.8e-22          |           | N/A           |              | 0.02174                     | 0.89                      |               | 37857 | 980689  |           |                        | 0.00%<br>organelle/plastid%      |
| 2       | CL2                  | 12.000    | 116614                | 1.3e-21          |           | N/A           |              | 0.01780                     | 0.86                      |               | 38536 | 814583  |           |                        | 4.99%<br>organelle/mitochondria% |
| 3       | CL3                  | 3.600     | 35486                 | 2.2e-23          |           | N/A           |              | 0.00132                     | 0.81                      |               | 35479 | 3961892 |           |                        |                                  |
| 3       | CL3                  | 3.600     | 35486                 | 2.2e-23          |           | N/A           |              | 0.00132                     | 0.81                      |               | 35479 | 3961892 |           |                        |                                  |
| 4       | CL4                  | 3.600     | 35313                 | 1.7e-08          |           | N/A           |              | 0.36770                     | 0.84                      |               | 35069 | 1558025 |           |                        |                                  |
| 5       | CL5                  | 3.400     | 34106                 | 9.5e-06          |           | N/A           |              | 0.46569                     | 0.63                      |               | 34104 | 3713198 |           |                        |                                  |
| 8       | CL8                  | 2.000     | 19997                 | 3.8e-22          |           | N/A           |              | 0.00690                     | 0.80                      |               | 19997 | 1489306 |           |                        | 0.02%<br>organelle/mitochondria% |
| 9       | CL9                  | 1.600     | 15824                 | 3.3e-22          |           | N/A           |              | 0.00531                     | 0.81                      |               | 15824 | 6796896 |           |                        |                                  |
| 12      | CL12                 | 0.850     | 8459                  | 1.5e-21          |           | N/A           |              | 0.00012                     | 0.55                      |               | 8459  | 28788   |           |                        |                                  |
| 13      | CL13                 | 0.850     | 8459                  | 4.7e-23          |           | N/A           |              | 0.00059                     | 0.77                      |               | 8459  | 131061  |           |                        |                                  |
| 14      | CL14                 | 0.840     | 8338                  | 1.4e-23          |           | N/A           |              | 0.00084                     | 0.83                      |               | 8338  | 219419  |           |                        | 6.82%<br>organelle/mitochondria% |
| 15      | CL15                 | 0.840     | 8314                  | 2.7e-22          |           | N/A           |              | 0.00036                     | 0.67                      |               | 8314  | 93163   |           |                        |                                  |
| 16      | CL16                 | 0.760     | 7536                  | 3.1e-24          |           | N/A           |              | 0.00013                     | 0.90                      |               | 7536  | 136175  |           |                        | 1.51%<br>organelle/mitochondria% |
| 17      | CL17                 | 0.710     | 7021                  | 2.1e-06          |           | N/A           |              | 0.43769                     | 0.65                      |               | 7021  | 322212  |           |                        |                                  |
| 20      | CL20                 | 0.650     | 6480                  | 3.9e-23          |           | N/A           |              | 0.00185                     | 0.78                      |               | 6480  | 79344   |           |                        | 1.85%<br>organelle/mitochondria% |
| 21      | CL21                 | 0.650     | 6479                  | 4.6e-05          |           | N/A           |              | 0.52307                     | 0.71                      |               | 6479  | 27305   |           |                        |                                  |

# Detailed report for cluster CL7

|    | kmer | variant | total_score | monomer_length | score_bn | consensus                                                                                                               | graph_image | logo_image |
|----|------|---------|-------------|----------------|----------|-------------------------------------------------------------------------------------------------------------------------|-------------|------------|
| 1  | 11   | 2       | 0.538       | 59             | 5.0e-03  | GTCTGTTGTCGAGATTTTGTACTCCAATGGATGGTAGCCTTGTCATTATGGAAGGTA                                                               |             |            |
| 2  | 15   | 2       | 0.505       | 59             | 5.5e-03  | TCTGTTGTCGAGATTTTGTACTCCAATGGATGGTAGCCTTGTCATTATGGAAGGTA                                                                |             |            |
| 3  | 19   | 2       | 0.484       | 59             | 5.4e-03  | TCTGTTGTCGAGATTTTGTACTCCAATGGATGGTAGCCTTGTCATTATGGAAGGTA                                                                |             |            |
| 4  | 23   | 3       | 0.463       | 59             | 5.6e-03  | TCTGTTGTCGAGATTTTGTACTCCAATGGATGGTAGCCTTGTCATTATGGAAGGTA                                                                |             |            |
| 5  | 27   | 3       | 0.421       | 59             | 5.2e-03  | AGTCTGTTGTCGAGATTTTGTACTCCAATGGATGGTAGCCTTGTCATTATGGAAGGT                                                               |             |            |
| 6  | 11   | 1       | 0.323       | 58             | 1.2e-03  | TTACTCCAATGGATGGTAGCCTTGTCATTATGGAAGGTAGTTTGTGTTGAGATTTTG                                                               |             |            |
| 7  | 27   | 6       | 0.279       | 118            | 1.1e-03  | AGGTAGTCTGTTGTCGAGATTTTGTACTCCAATGGATGGTAGCCTTGTCATTATGGAAGGTAGTCTGTTGTCGAGATT<br>TTTGTACTCCAATGGATGGTAGCCTTGTCATTATGGA |             |            |
| 8  | 15   | 1       | 0.275       | 58             | 1.2e-03  | GAAGGTAGTCTGTTGTTGAGATTTTGTACTCCAATGGATGGTAGCCTTGTCATTATG                                                               |             |            |
| 9  | 23   | 2       | 0.248       | 58             | 1.4e-03  | TCTGTTGTCGAGATTTTGTACTCCAATGGATGGTAGCCTTGTCATTATGGAAGGTA                                                                |             |            |
| 10 | 19   | 1       | 0.245       | 58             | 1.2e-03  | TAGTCTGTTGTCGAGATTTTGTACTCCAATGGATGGTAGCCTTGTCATTATGGAAGG                                                               |             |            |
| 11 | 27   | 2       | 0.215       | 58             | 1.3e-03  | GTCTGTTGTCGAGATTTTGTACTCCAATGGATGGTAGCCTTGTCATTATGGAAGGTA                                                               |             |            |
| 12 | 27   | 5       | 0.190       | 117            | 7.4e-04  | ATTATGGAAGGTAGTCTGTTGTCGAGATTTTGTACTCCAATGGATGGTAGCCTTGTCATTATGGAAGGTAGTCTGTTG<br>TCGAGATTTTGTACTCCAATGGATGGTAGCCTTGTC  |             |            |
